# Supplementary material for: Cannabidiol (CBD) content in vaporized cannabis does not prevent tetrahydrocannabinol (THC)-induced impairment of driving and cognition
Source: PubMed Central journal article supplement (PMC6695367; doi:10.1007/s00213-019-05246-8), 2019-05-01

# Adelaide Driving Self-Efficacy Scale

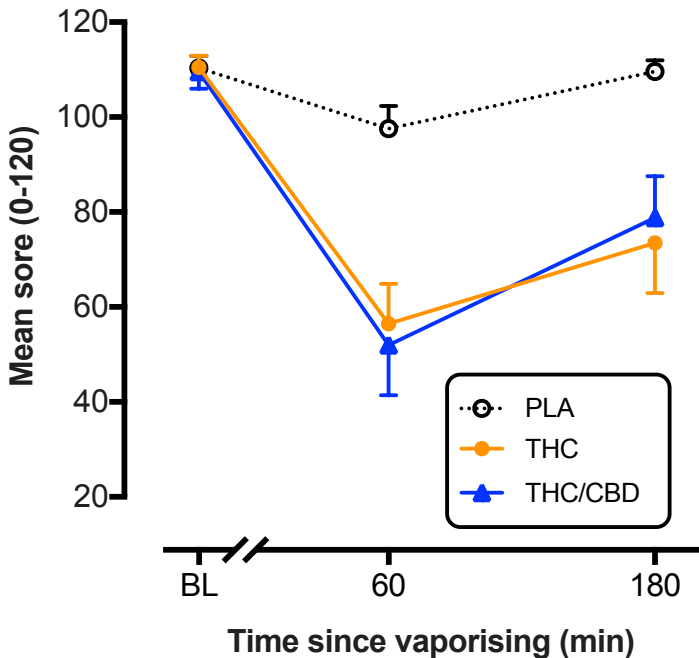

Supplement: 213_2019_5246_MOESM1_ESM.pdf [file 213_2019_5246_MOESM1_ESM.pdf]
